# Supplementary material
Source: PubMed Central journal article supplement (PMC2174183)

# Supplementary Figure:

**A**

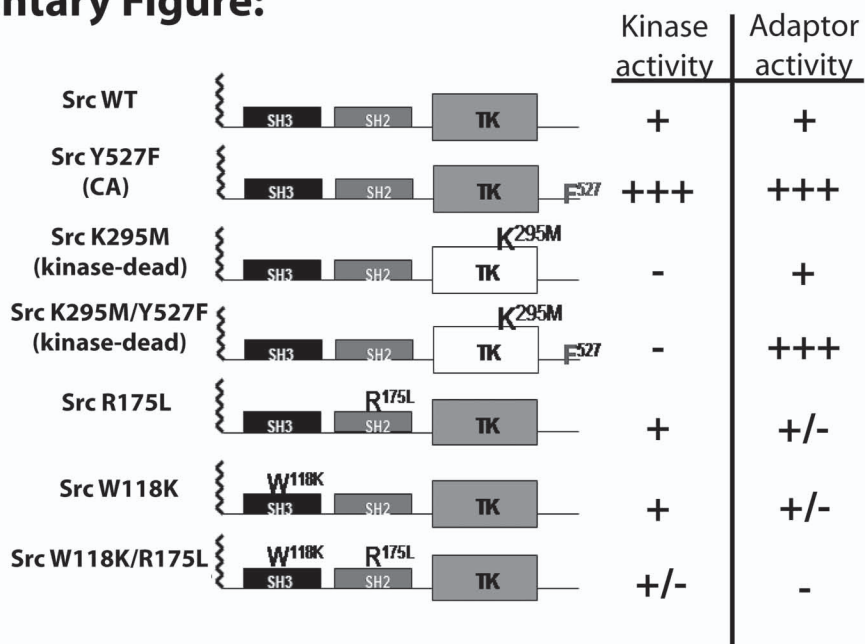

**B**

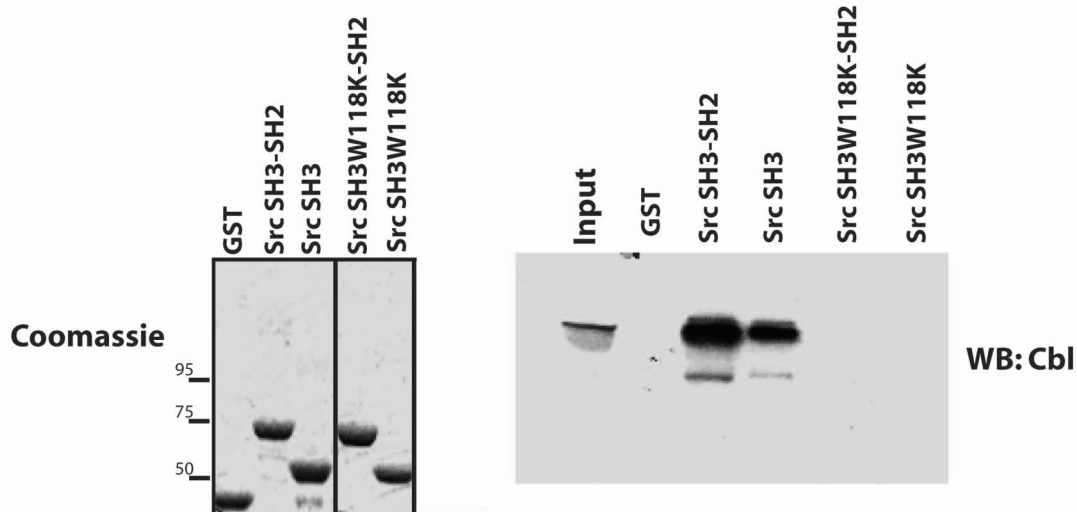

**C**

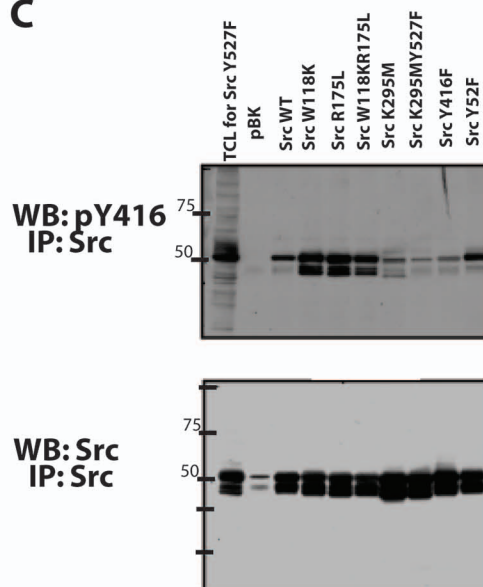

**D**

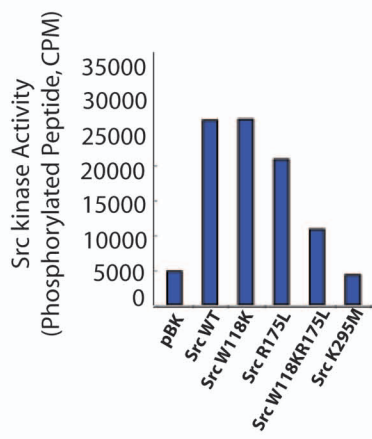

Supplement: mbc_E07-03-0227_1.pdf [file mbc_E07-03-0227_1.pdf]
